# Supplementary material for: Gene Expression Profiling of NFATc1-Knockdown in RAW 264.7 Cells: An Alternative Pathway for Macrophage Differentiation
Source: PubMed Central journal article supplement (PMC6406727; doi:10.3390/cells8020131), 2019-02-07
Supplement: cells-08-00131-s001.pdf [file cells-08-00131-s001.pdf]

Table S1. List of genes from untransfected RAW 264.7 cells.

| Gene Symbol | Fold change | Gene Symbol | Fold change | Gene Symbol | Fold change | Gene Symbol | Fold change | Gene Symbol | Fold change | Gene Symbol | Fold change |
|-------------|-------------|-------------|-------------|-------------|-------------|-------------|-------------|-------------|-------------|-------------|-------------|
| Acp5        | 41.89       | Creb1       | 1.18        | Gtf2b       | -1.14       | Ltbp2       | 6.05        | PPARa       | 1.53        | Tbp         | 1.19        |
| Adcy10      | -1.03       | Crebbp      | 1.25        | Gtf2f1      | 1.20        | Mab21l2     | 1.84        | PPARG       | -1.53       | Tcf7l2      | -1.52       |
| Alox12      | -6.37       | Crtap       | 3.49        | Hand1       | -1.37       | Max         | 1.36        | Prl         | -1.03       | Tfap2a      | 3.09        |
| Alox15      | -47.76      | Ctnnb1      | -1.33       | Hand2       | 1.06        | Mef2a       | -1.60       | Pth         | 2.00        | Tgfb1       | 1.26        |
| Alox5       | -36.52      | Ctsk        | -1.32       | Hdac1       | 1.43        | Mef2b       | -3.15       | Pth1r       | 2.38        | Tgif1       | 1.55        |
| Alpl        | -1.03       | Cyp17a1     | -26.60      | Hif1a       | 1.39        | Mef2c       | -2.98       | Pthlh       | -1.03       | TIMP2       | -2.22       |
| Ar          | -1.37       | Cyp19a1     | -1.03       | Hnf1a       | 3.59        | MMP2        | -2.23       | Rb1         | -2.65       | Tnfrsf3     | -1.64       |
| Arnt        | 1.08        | DKK1        | -1.03       | Hnf4a       | -1.37       | Mstn        | -1.03       | Rel         | -1.41       | Tnfrsf11a   | 5.26        |
| Atf1        | 1.35        | Dbp         | 1.20        | Hoxa5       | -1.37       | Mthfr       | 1.39        | RelA        | 1.29        | Tnfrsf11b   | -1.03       |
| Atf2        | -1.40       | Dr1         | 1.14        | Hsd11b1     | 19.75       | Myc         | 108.70      | Runx2       | 1.05        | Tnfrsf1b    | -4.27       |
| Atf3        | -652.60     | E2f1        | 1.68        | Hsf1        | 1.47        | Myf5        | 2.58        | Sfrp1       | -1.03       | Tnfsf11     | 2.42        |
| Atf4        | -1.76       | E2f6        | 2.06        | Idi1        | -2.89       | Myod1       | 1.79        | Sfrp4       | -1.03       | Trp53       | 1.70        |
| Bglap       | 13.96       | Egr1        | -144.98     | Igf1        | -3.43       | Nanos2      | 1.01        | Shbg        | 266.84      | Tshr        | 1.77        |
| Bmp2        | -4.15       | Enpp1       | 9.27        | Igfbp2      | -1.03       | NFAT5       | 1.36        | SMAD1       | -1.29       | Twist1      | 51.33       |
| Bmp7        | -1.03       | Esr1        | -2.78       | IL15        | 2.50        | NFATc1      | 14.63       | SMAD4       | -1.14       | Vdr         | -103        |
| Calca       | -1.03       | Esr2        | -1.03       | IL6         | -1.03       | NFATc2      | -1.15       | SMAD5       | 3.14        | VEGFA       | -1.91       |
| Calcr       | 1.96        | Esrra       | 2.12        | IL6ra       | 1.18        | NFATc3      | 1.27        | SMAD9       | -1.37       | Wnt10b      | -1.02       |
| Car2        | -1.21       | Ets1        | 1.32        | Irf1        | -1.81       | NFATc4      | -6.64       | Sost        | -1.03       | Wnt3a       | -1.03       |
| Casr        | 1.97        | Ets2        | -2.53       | Itga1       | -1.03       | Nfkb1       | 1.93        | Sp1         | -1.04       | Yy1         | 1.37        |
| Cd40        | -1.11       | Fgfr1       | -4.50       | Itgb3       | -1.39       | Nfyb        | 1.51        | Sp3         | 1.17        |             |             |
| Cebpa       | -1.30       | Fgfr2       | -1.03       | Jun         | -11.85      | Nog         | 3.07        | Sparc       | -1.03       |             |             |
| Cebpb       | -2.14       | Fos         | -1.75       | JunB        | -1.01       | Nos3        | -1.03       | Spp1        | -2.27       |             |             |
| Cebpg       | 1.02        | Foxa2       | -1.37       | JunD        | -2.72       | Npy         | -9.74       | STAT1       | -1.32       |             |             |
| Clasrp      | 1.79        | Foxg1       | 8.82        | Kcnh8       | 1.33        | Nr3c1       | 1.21        | STAT2       | 1.28        |             |             |
| Clcn7       | 1.10        | GATA1       | -1.37       | Lep         | -2.42       | P2rx7       | -1.86       | STAT3       | 1.17        |             |             |
| Cnr2        | -4.46       | GATA2       | 2.59        | Lrp1        | 1.10        | P3h1        | 2.61        | STAT4       | 5.18        |             |             |
| Col1a1      | 9.77        | GATA3       | 2.23        | Lrp5        | 1.50        | Pax6        | -1.02       | STAT5a      | -1.17       |             |             |
| Col1a2      | 5.00        | Ghrh        | 1.57        | Lrp6        | 1.72        | Plod2       | -1.17       | STAT5b      | -1.36       |             |             |
| Comt        | 1.72        | Gli1        | 4.79        | Lta         | 2.22        | Pou2af1     | 1.20        | STAT6a      | 1.84        |             |             |

Table S2. List of genes from NFATc1-knockdown RAW 264.7 cells.

| Gene Symbol | Fold change | Gene Symbol | Fold change | Gene Symbol | Fold change | Gene Symbol | Fold change | Gene Symbol | Fold change | Gene Symbol | Fold change |
|-------------|-------------|-------------|-------------|-------------|-------------|-------------|-------------|-------------|-------------|-------------|-------------|
| Acp5        | -3.06       | Creb1       | -1.14       | Gtf2b       | 1.8         | Ltbp2       | 1.84        | PPARa       | 1.97        | Tbp         | 1.3         |
| Adcy10      | 1.01        | Crebbp      | -1.01       | Gtf2f1      | 1.04        | Mab21l2     | -1.68       | PPARg       | 1.42        | Tcf7l2      | 1.01        |
| Alox12      | 1.01        | Crtap       | -1.14       | Hand1       | 3.33        | Max         | 1.18        | Prl         | 1.01        | Tfap2a      | -10.74      |
| Alox15      | 5.25        | Ctnnb1      | 1.38        | Hand2       | 1.63        | Mef2a       | 1.26        | Pth         | -1.59       | Tgfb1       | 1.07        |
| Alox5       | 3.83        | Ctsk        | -4.51       | Hdac1       | 1.19        | Mef2b       | 1.41        | Pth1r       | -1.08       | Tgif1       | 1.4         |
| Alpl        | 5.18        | Cyp17a1     | -1.64       | Hif1a       | 1.08        | Mef2c       | -1.06       | Pthlh       | 2.1         | TIMP2       | 3.26        |
| Ar          | 1.01        | Cyp19a1     | 1.01        | Hnf1a       | -1.15       | MMP2        | 1.49        | Rb1         | 1.42        | Tnfaip3     | -1.13       |
| Arnt        | 1.24        | DKK1        | 1.01        | Hnf4a       | -1.01       | Mstn        | 1.01        | Rel         | 1.11        | Tnfrsf11a   | -1.08       |
| Atf1        | 1.36        | Dbp         | 1.28        | Hoxa5       | -7.29       | Mthfr       | -1.23       | RelA        | 1.58        | Tnfrsf11b   | 1.01        |
| Atf2        | 1.33        | Dr1         | 1.14        | Hsd11b1     | 1.01        | Myc         | 1.16        | Runx2       | 2.88        | Tnfrsf1b    | 1.07        |
| Atf3        | 1.45        | E2f1        | 1.36        | Hsf1        | -1.22       | Myf5        | 2.54        | Sfrp1       | 1.01        | Tnfsf11     | -2.22       |
| Atf4        | -1.29       | E2f6        | -1.15       | Idi1        | 1.95        | Myod1       | 3.21        | Sfrp4       | 1.01        | Trp53       | 1.01        |
| Bglap       | 1.53        | Egr1        | -1.54       | Igf1        | 3.72        | Nanos2      | -2.12       | Shbg        | 3.4         | Tshr        | -1.26       |
| Bmp2        | -3.69       | Enpp1       | 1.18        | Igfbp2      | 1.01        | NFAT5       | 1.12        | SMAD1       | 1.39        | Twist1      | 1.01        |
| Bmp7        | 1.01        | Esr1        | 1.01        | IL15        | 1.44        | NFATc1      | -4.46       | SMAD4       | 1.09        | Vdr         | -1.15       |
| Calca       | 1.01        | Esr2        | 1.01        | IL6         | 1.01        | NFATc2      | 1.34        | SMAD5       | 1.13        | VEGFa       | -1.83       |
| Calcr       | -1.44       | Esrra       | -1.86       | IL6ra       | -1.42       | NFATc3      | 1.03        | SMAD9       | -1.01       | Wnt10b      | 1.01        |
| Car2        | 1.92        | Ets1        | -1.7        | Irf1        | 1.23        | NFATc4      | -1.32       | Sost        | 1.01        | Wnt3a       | 1.01        |
| Casr        | -2.61       | Ets2        | 2.76        | Itga1       | 1.01        | Nfkb1       | 1.45        | Sp1         | 1.22        | Yy1         | 1.1         |
| Cd40        | 1.95        | Fgfr1       | -12.61      | Itgb3       | -1.25       | Nfyb        | -1.01       | Sp3         | 1.52        |             |             |
| Cebpa       | 1.23        | Fgfr2       | 1.01        | Jun         | 1.66        | Nog         | -1.54       | Sparc       | 1.01        |             |             |
| Cebpb       | 1.11        | Fos         | 1.15        | JunB        | -1.01       | Nos3        | 1.01        | Spp1        | 3.86        |             |             |
| Cebpg       | 1.15        | Foxa2       | 1.64        | JunD        | 1.17        | Npy         | 1.09        | STAT1       | 1.75        |             |             |
| Clasrp      | -1.01       | Foxg1       | -1.36       | Kcnh8       | 2.52        | Nr3c1       | 1.28        | STAT2       | 2.44        |             |             |
| Cln7        | -1.15       | GATA1       | -1.01       | Lep         | 3.51        | P2rx7       | 1.02        | STAT3       | 1.27        |             |             |
| Cnr2        | 2.04        | GATA2       | 32.4        | Lrp1        | 1.25        | P3h1        | 1.09        | STAT4       | -1.03       |             |             |
| Col1a1      | -1.42       | GATA3       | 1.01        | Lrp5        | -1.24       | Pax6        | -1.39       | STAT5a      | -1          |             |             |
| Col1a2      | 13.16       | Ghrh        | -1.49       | Lrp6        | -1.19       | Plod2       | -2.26       | STAT5b      | 1.21        |             |             |
| Comt        | 1.02        | Gli1        | 4.1         | Lta         | -1.4        | Pou2af1     | 1.02        | STAT6a      | 1.33        |             |             |
